# Supplementary material for: Coumarin functionalized thiocarbonohydrazones as a new class of chromofluorescent receptors for selective detection of fluoride ion
Source: Royal Society of Chemistry journal article supplement (doi:10.1039/c6ra19647k), 2016-01-01
Supplement: c6ra19647k1.pdf [file c6ra19647k1.pdf]

# Coumarin functionalized thiocarbonhydrazones as a new class of chromofluorescent receptors for selective detection of fluoride ion†

Satya Narayan Sahu,<sup>1\*</sup> Subrata Kumar Padhan<sup>1</sup> and Prabhat Kumar Sahu<sup>2</sup>

<sup>1</sup>School of Chemistry, Sambalpur University, Jyoti Vihar, Burla-768 019, Odisha, India

<sup>2</sup>Department of Chemistry, NIST, Palur Hills, Berhampur-761 008, Odisha, India

Email: snsahu.chem@gmail.com

## Electronic Supplementary Information (ESI†)

### Contents

|                                                                                                                                                                                                                                                        | Page |
|--------------------------------------------------------------------------------------------------------------------------------------------------------------------------------------------------------------------------------------------------------|------|
| Synthesis procedure of receptors <b>4</b> and <b>5</b>                                                                                                                                                                                                 | 2    |
| Characterization of receptor <b>4</b>                                                                                                                                                                                                                  | 2    |
| <b>Figure S1</b> : <sup>1</sup> H NMR spectrum of <b>4</b> in DMSO- <i>d</i> <sub>6</sub> .                                                                                                                                                            | 3    |
| <b>Figure S2</b> : <sup>13</sup> C NMR spectrum of <b>4</b> in DMSO- <i>d</i> <sub>6</sub> .                                                                                                                                                           | 3    |
| <b>Figure S3</b> : FT-IR spectrum of <b>4</b> .                                                                                                                                                                                                        | 4    |
| Characterization of receptor <b>5</b>                                                                                                                                                                                                                  | 4    |
| <b>Figure S4</b> : <sup>1</sup> H NMR spectrum of <b>5</b> in DMSO- <i>d</i> <sub>6</sub> .                                                                                                                                                            | 5    |
| <b>Figure S5</b> : <sup>13</sup> C NMR spectrum of <b>5</b> in DMSO- <i>d</i> <sub>6</sub> .                                                                                                                                                           | 5    |
| <b>Figure S6</b> : FT-IR spectrum of <b>5</b> .                                                                                                                                                                                                        | 6    |
| <b>Figure S7</b> : Observed colour change in <b>4</b> + F <sup>-</sup> complex solution in presence of water                                                                                                                                           | 6    |
| <b>Figure S8</b> : UV-visible titration spectra of <b>4</b> (20 μM) with 0–10 equiv. of acetate ion.                                                                                                                                                   | 7    |
| <b>Figure S9</b> : UV-visible titration spectra of <b>5</b> (20 μM) with 0–6 equiv. of acetate ion.                                                                                                                                                    | 7    |
| <b>Figure S10</b> : Benesi-Hildebrand (B-H) plot of <b>5</b> in presence of F <sup>-</sup> ion.                                                                                                                                                        | 8    |
| <b>Figure S11</b> : Benesi-Hildebrand plot of <b>4</b> with acetate ions.                                                                                                                                                                              | 8    |
| <b>Figure S12</b> : Benesi-Hildebrand plot of <b>5</b> with acetate ions.                                                                                                                                                                              | 9    |
| <b>Figure S13</b> : Emission spectra of <b>4</b> (10 μM) upon addition of F <sup>-</sup> , Cl <sup>-</sup> , Br <sup>-</sup> , I <sup>-</sup> , H <sub>2</sub> PO <sub>4</sub> <sup>-</sup> , HSO <sub>4</sub> <sup>-</sup> and AcO <sup>-</sup> ions. | 9    |
| <b>Figure S14</b> : Emission spectra of <b>5</b> (10 μM) upon addition of F <sup>-</sup> , Cl <sup>-</sup> , Br <sup>-</sup> , I <sup>-</sup> , H <sub>2</sub> PO <sub>4</sub> <sup>-</sup> , HSO <sub>4</sub> <sup>-</sup> and AcO <sup>-</sup> ions. | 10   |
| <b>Figure S15</b> : Fluorescent “turn on” behaviour of <b>5</b> in presence of fluoride ions                                                                                                                                                           | 10   |
| <b>Figure S16</b> : Partial <sup>1</sup> H NMR spectra of <b>4</b> in presence of fluoride ions                                                                                                                                                        | 11   |
| Cartesian coordinates of receptor <b>4</b>                                                                                                                                                                                                             | 12   |
| Cartesian coordinates of receptor <b>4</b> +F <sup>-</sup>                                                                                                                                                                                             | 13   |
| Procedure for Job’s plot experiment                                                                                                                                                                                                                    | 14   |
| General method for <sup>1</sup> H NMR titrations experiments                                                                                                                                                                                           | 14   |

## 1. Synthesis procedure of receptors **4** and **5**

A hot solution of thiocarbonohydrazide (0.28 gm, 2.64 mmol) in water (5 mL) was added slowly in dropwise manner over 15 minutes to the acetyl-coumarin derivative **1** (1.0 gm, 5.31 mmol) or **2** (1.26 gm, 5.29 mmol) dissolved in 30 mL ethanol under hot (50 °C) condition. Initially the solution looked turbid and solution became clear after complete addition of thiocarbonohydrazide. Then the solution was allowed to reflux for 6 h with stirring till complete precipitation if formed. The precipitate was cooled, filtered and washed with boiling water followed by hot ethanol to get a solid powder **4** (light orange colour) or **5** (yellowish colour) which was then dried in vacuum to obtain the pure product in quantitative yields (**4** = 82 %, **5** = 80 %).

## 2. Bis(3-acetyl-2*H*-chromen-2-one)thiocarbonohydrazone (**4**)

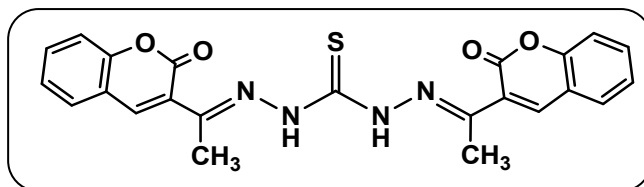

M.P. = 215 °C. <sup>1</sup>H NMR (400 MHz, *DMSO-d*<sub>6</sub>) δ (ppm) = 2.21 (6H, s, CH<sub>3</sub>), 7.37-7.43 (4H, m, Ar-H), 7.62-7.66 (2H, m, Ar-H), 7.74 (2H, d, *J* = 8.0 Hz, Ar-H), 8.47 (2H, s, =CH-Ar), 9.76 (1H, s, -NH, D<sub>2</sub>O exchangeable), 10.41 (1H, s, NH, D<sub>2</sub>O exchangeable). <sup>13</sup>C NMR (100 MHz, *DMSO-d*<sub>6</sub>) δ (ppm) = 11.2, 114.7, 116.5, 119.2, 124.8, 129.2, 140.4, 140.5, 158.6, 160.4, 162.8, 174.4. FT-IR (KBr) ν (cm<sup>-1</sup>) = 3270, 2937, 1715, 1601 (>C=N-), 1532, 1505, 1427, 1375, 1240 (>C=S), 1152, 1125, 1098, 1008, 978, 850. UV-vis. (DMSO, 20 μM) = λ<sub>max</sub> (nm) 342 (n-π\*). Fluorescence emission at λ<sub>ex</sub> 360 nm (DMSO, 10 μM) = 437 nm.

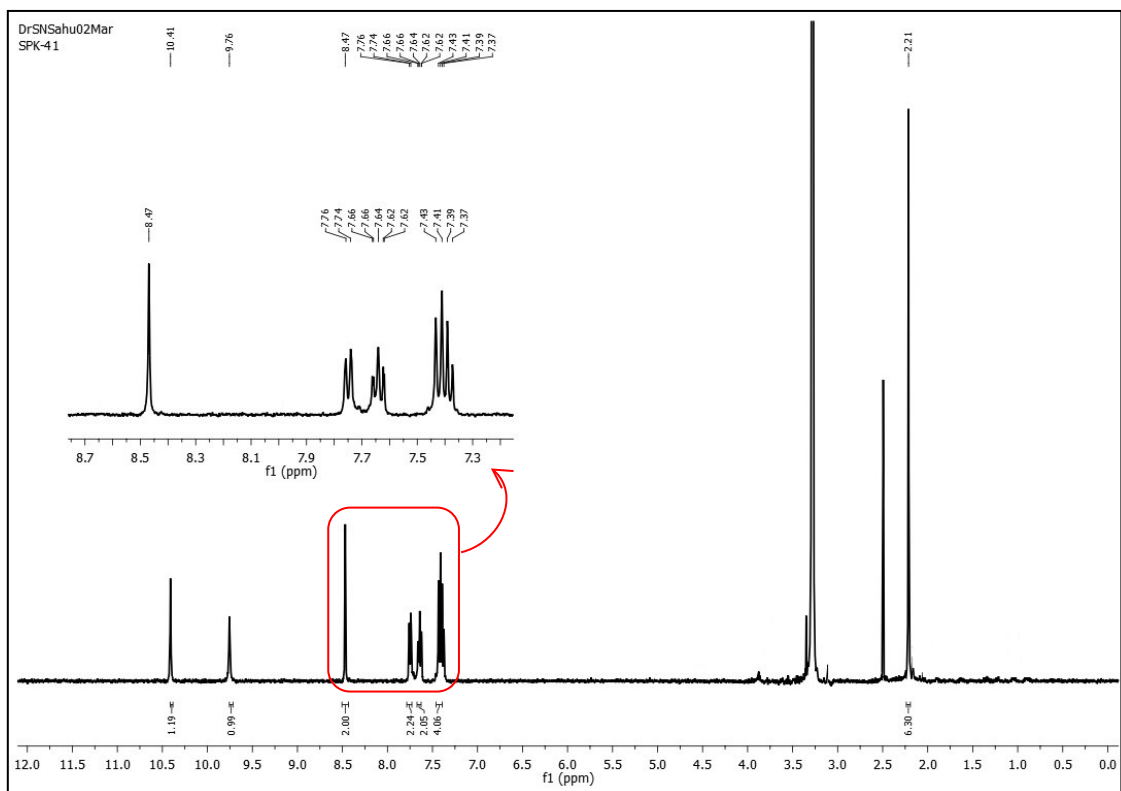

**Figure S1:**  $^1\text{H}$  NMR spectrum of **4** in  $\text{DMSO-}d_6$ .

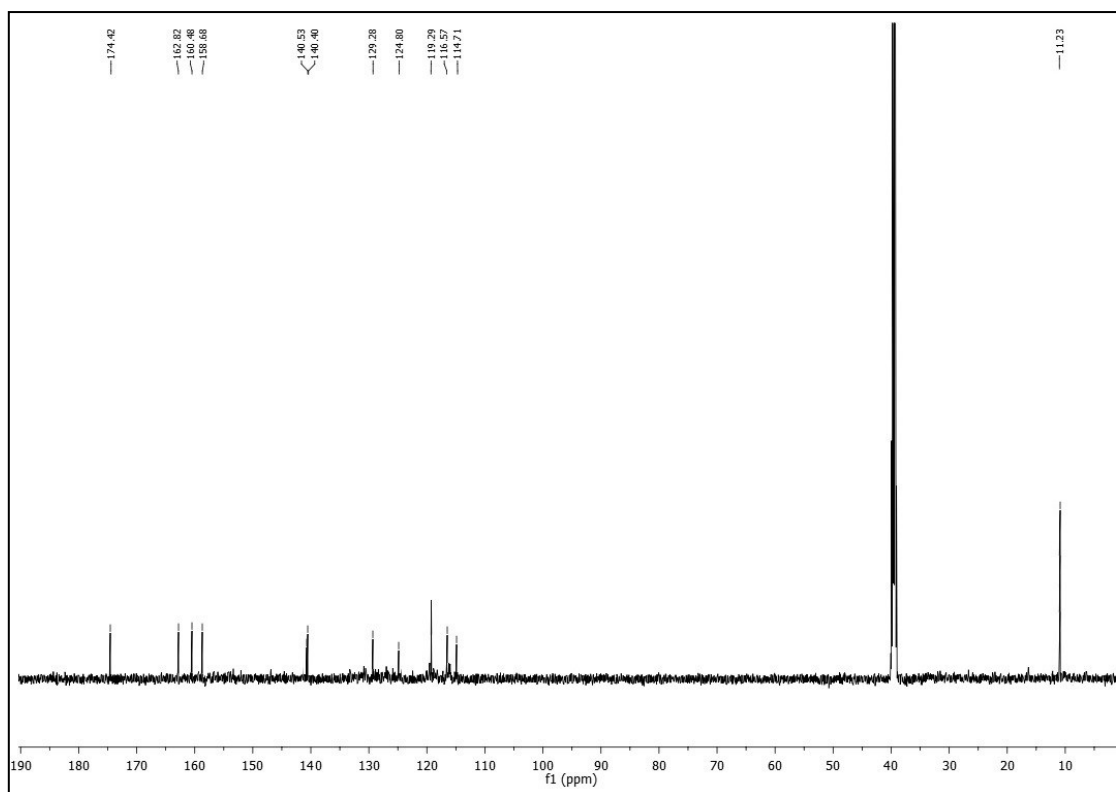

**Figure S2:**  $^{13}\text{C}$  NMR spectrum of **4** in  $\text{DMSO-}d_6$ .

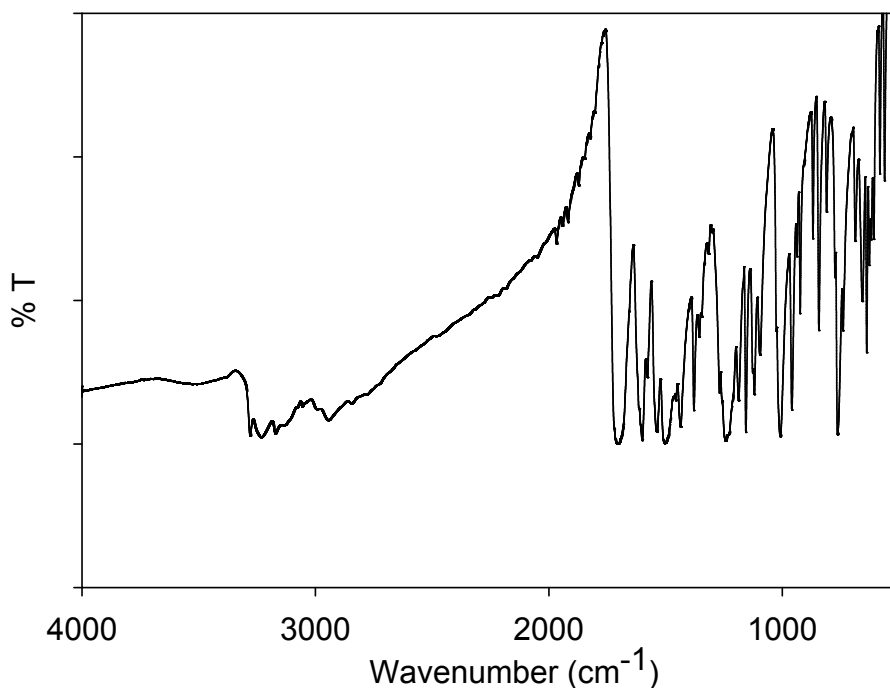

Figure S3: FT-IR spectrum of 4.

### 3. Bis[2-acetyl-3*H*-benzo[*f*]chromen-3-one]thiocarbonohydrazone (5)

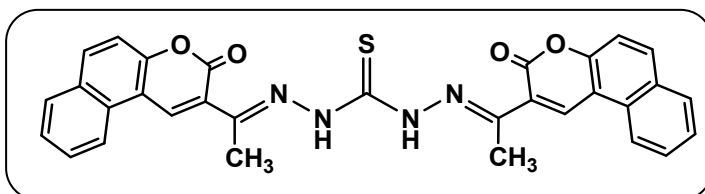

M.P. = 221 °C. <sup>1</sup>H NMR (400 MHz, *DMSO-d*<sub>6</sub>) δ (ppm) = 2.27 (6H, s, CH<sub>3</sub>), 7.58-7.66 (4H, m, Ar-H), 7.76 (2H, m, Ar-H), 8.05 (2H, d, *J* = 8.0 Hz, Ar-H), 8.20 (2H, d, *J* = 8.0 Hz, Ar-H), 8.68 (2H, d, *J* = 8.0 Hz, Ar-H), 9.12 (2H, s, =CH-Ar), 9.97 (1H, s, -NH, D<sub>2</sub>O exchangeable), 10.40 (1H, s, NH, D<sub>2</sub>O exchangeable). <sup>13</sup>C NMR (100 MHz, *DMSO-d*<sub>6</sub>) δ (ppm) = 12.6, 112.3, 116.4, 122.3, 122.9, 126.5, 129.1, 129.3, 129.8, 136.2, 142.4, 155.3, 158.4, 179.0. FT-IR (KBr) ν (cm<sup>-1</sup>) = 3225, 3005, 1725, 1675, 1599 (>C=N-), 1552, 1510, 1453, 1390, 1353, 1246 (>C=S), 1210, 1097, 1024, 975, 825. UV-vis. (*DMSO*, 20 μM) = λ<sub>max</sub> (nm) 379 (n-π\*). Fluorescence emission at λ<sub>ex</sub> 360 nm (*DMSO*, 10 μM) = 455 nm.

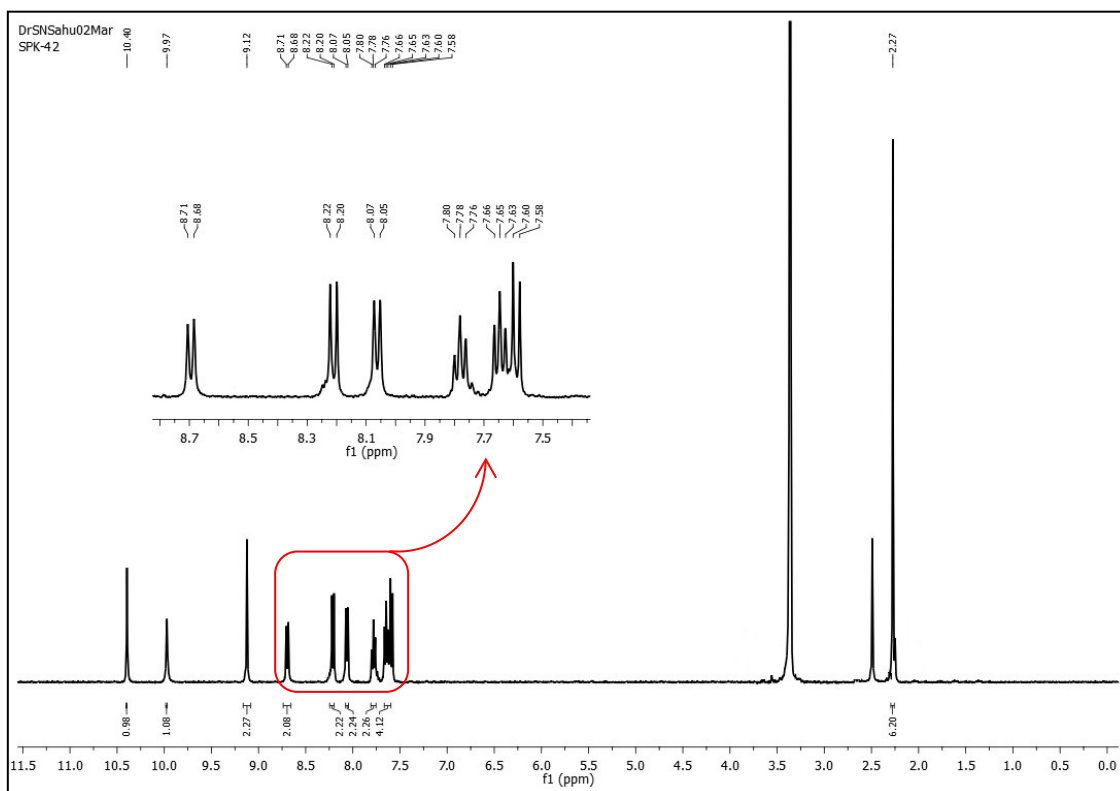

**Figure S4:**  $^1\text{H}$  NMR spectrum of **5** in  $\text{DMSO-}d_6$ .

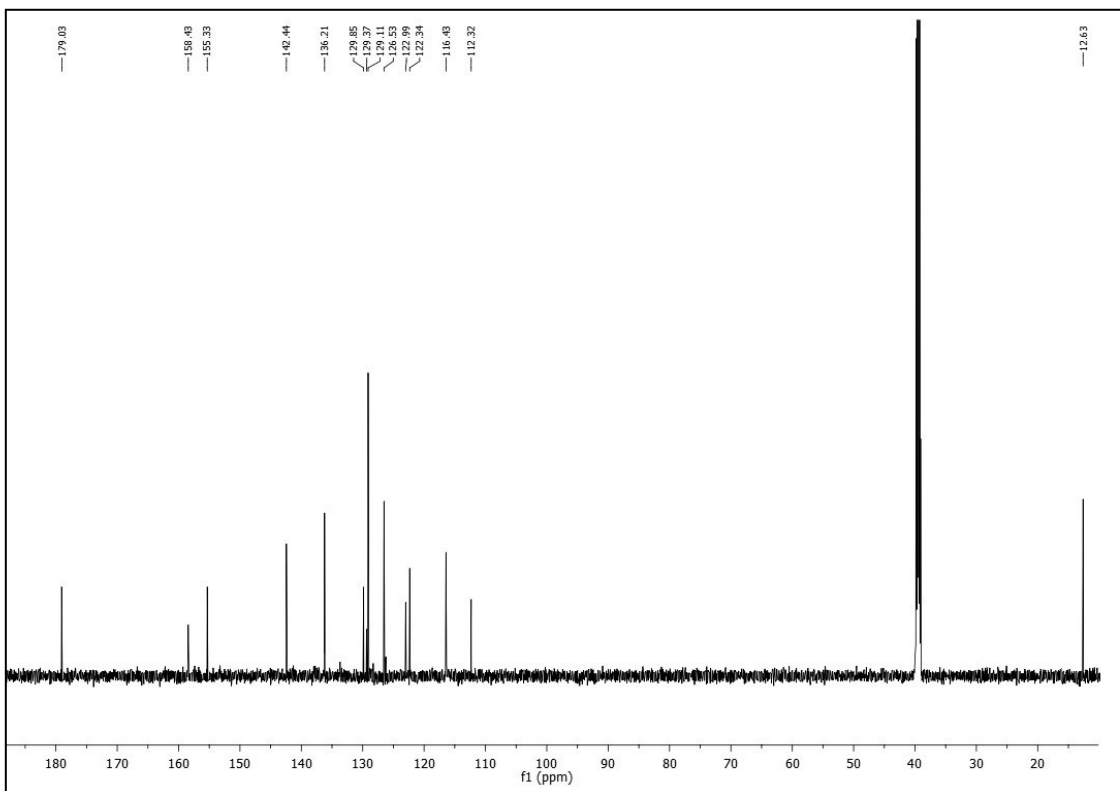

**Figure S5:**  $^{13}\text{C}$  NMR spectrum of **5** in  $\text{DMSO-}d_6$ .

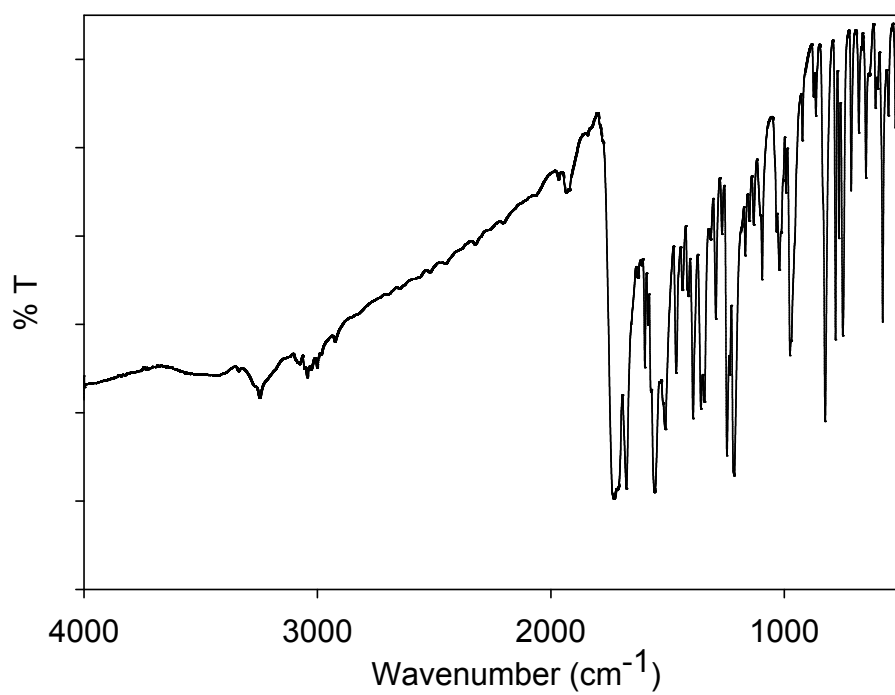

**Figure S6:** FT-IR spectrum of **5**.

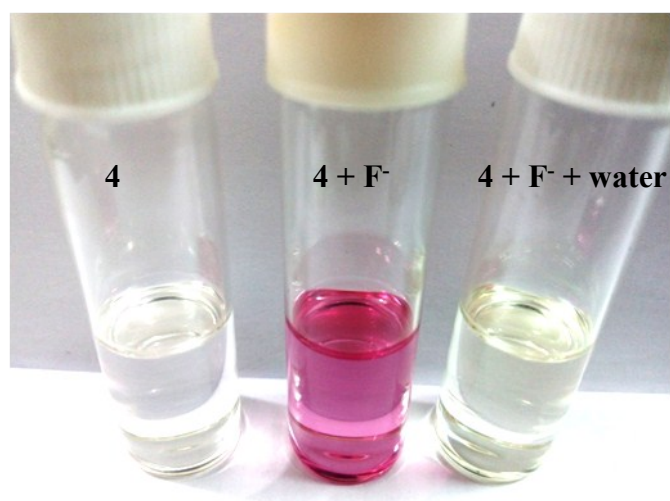

**Figure S7:** Colour changes observed by addition of few drops of water to receptor **4**+  $F^-$  complex solution

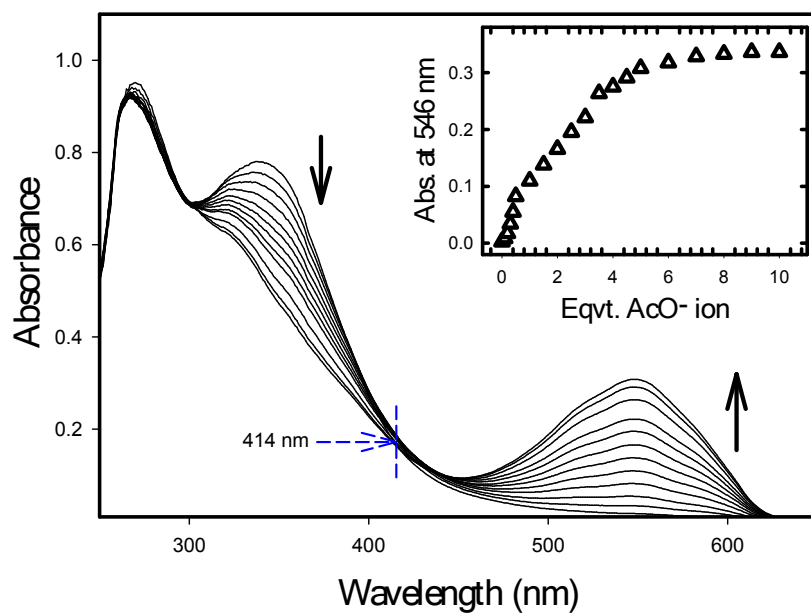

**Figure S8:** UV-visible titration spectra of **4** (20 μM) with 0–10 equiv. of acetate ion (TBA salt) in DMSO. Inset shows the change in absorbance at 546 nm with the addition of various equiv. of AcO<sup>-</sup> ions.

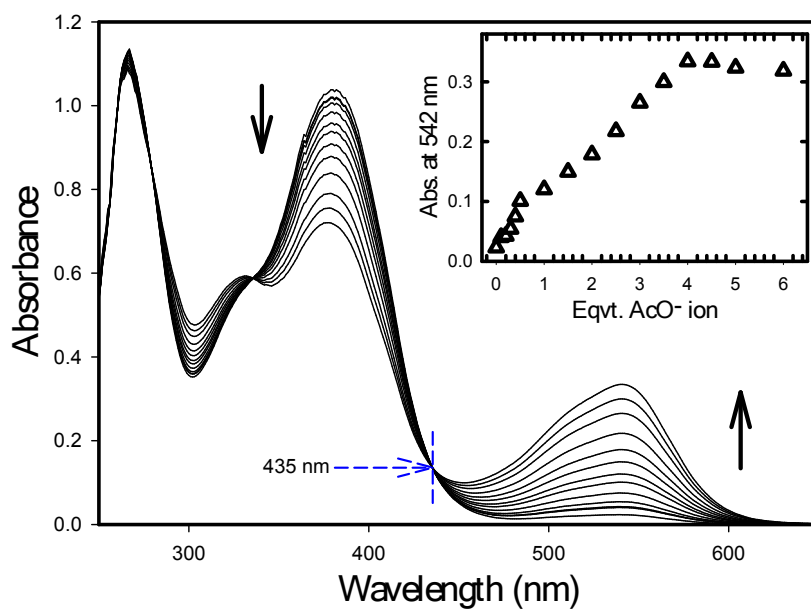

**Figure S9:** UV-visible titration spectra of **5** (20 μM) with 0–6 equiv. of acetate ion (TBA salt) in DMSO. Inset shows the change in absorbance at 542 nm with the addition of various equiv. of AcO<sup>-</sup> ions.

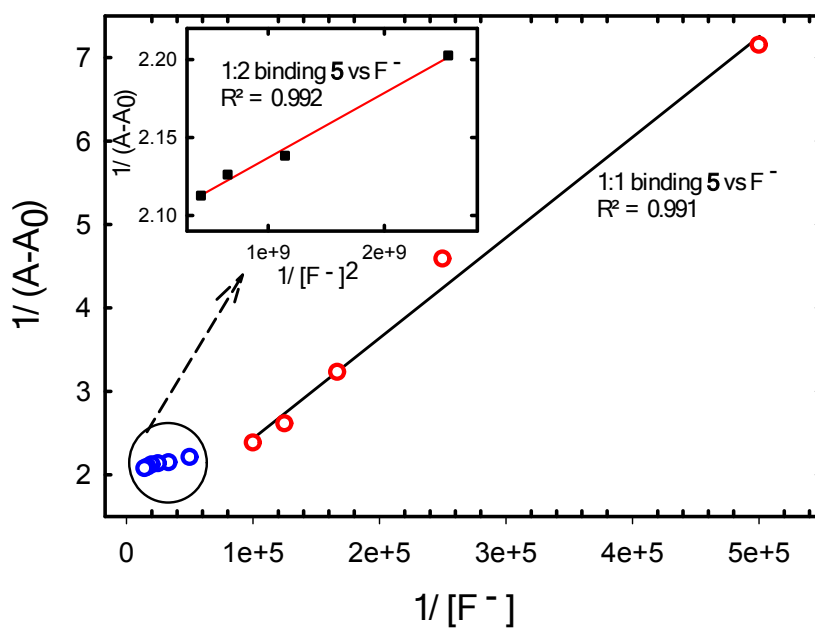

**Figure S10:** Benesi-Hildebrand (B-H) plot of  $1/(A-A_0)$  at 542 nm vs  $1/[F^-]$  indicating 1:1 binding between **5** and  $F^-$  ion. Inset shows the B-H plot of  $1/(A-A_0)$  at 542 nm vs  $1/[F^-]^2$  indicating 1:2 binding between **5** and  $F^-$  ion.

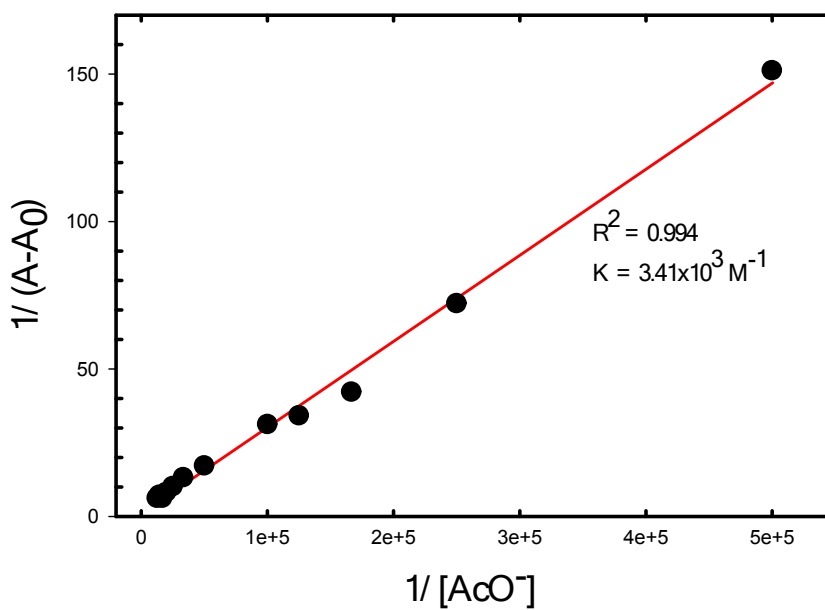

**Figure S11:** Benesi-Hildebrand plot of **4** with acetate ions indicating 1:1 binding stoichiometry.



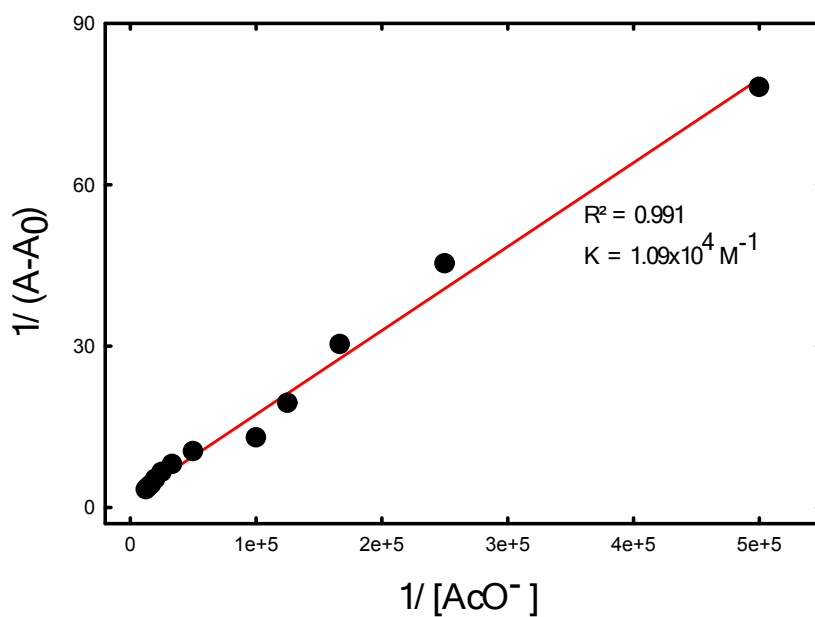

**Figure S12:** Benesi-Hildebrand plot of **5** with acetate ions indicating 1:1 binding stoichiometry.

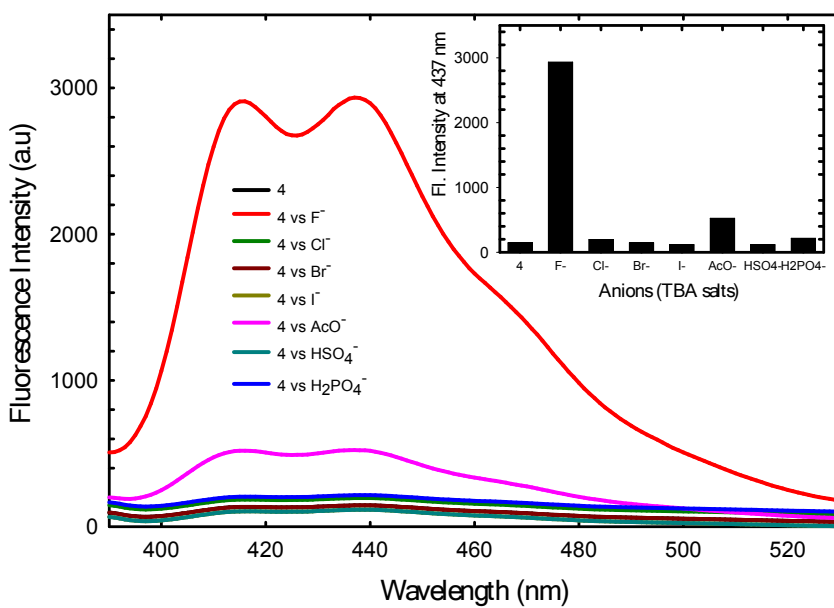

**Figure S13:** Emission spectra of **4** (10  $\mu\text{M}$ ) upon addition of 10 equiv. of  $F^-$ ,  $Cl^-$ ,  $Br^-$ ,  $I^-$ ,  $H_2PO_4^-$ ,  $HSO_4^-$  and  $AcO^-$  ions (as tetrabutylammonium salts) in DMSO,  $\lambda_{\text{ex}} = 360 \text{ nm}$ . Inset shows the emission intensity at 437 nm vs. various anions

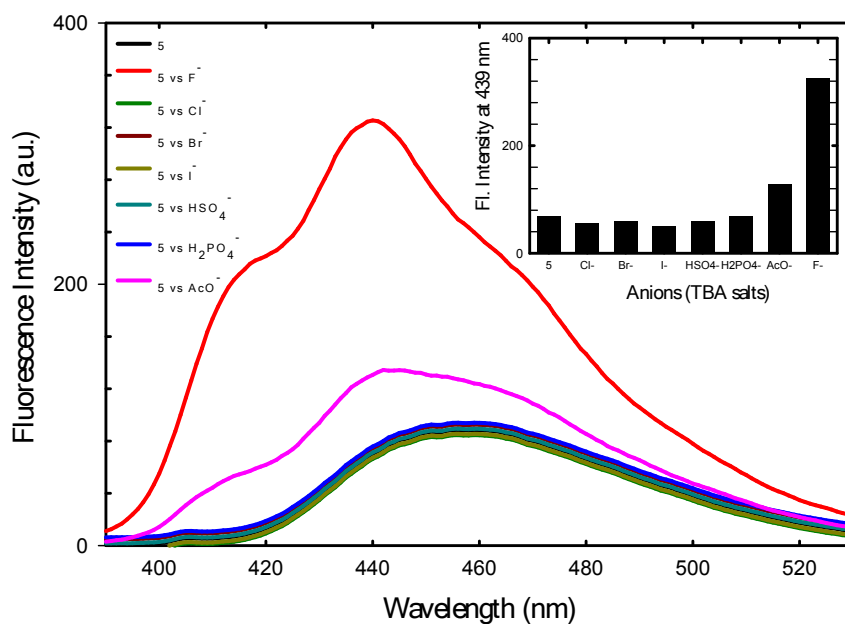

**Figure S14:** Emission spectra of **5** (10  $\mu\text{M}$ ) upon addition of 10 equiv. of  $\text{F}^-$ ,  $\text{Cl}^-$ ,  $\text{Br}^-$ ,  $\text{I}^-$ ,  $\text{H}_2\text{PO}_4^-$ ,  $\text{HSO}_4^-$  and  $\text{AcO}^-$  ions (as tetrabutylammonium salts) in DMSO,  $\lambda_{\text{ex}} = 360 \text{ nm}$ . Inset shows the emission intensity at 439 nm vs. various anions

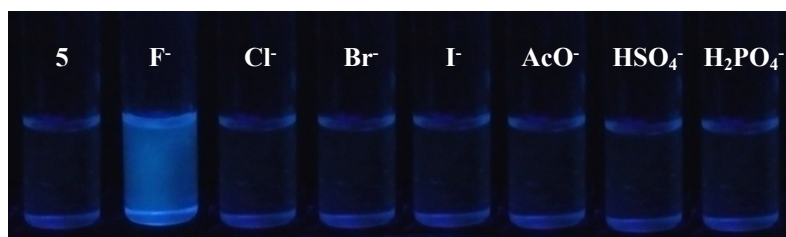

**Figure S15:** Fluorescent “turn on” behaviour of **5** for fluoride ion over other anions in DMSO solution (10 $\mu\text{M}$ ) with the addition of 5 equivalents of various anions (as TBA salts) under UV light (365 nm).

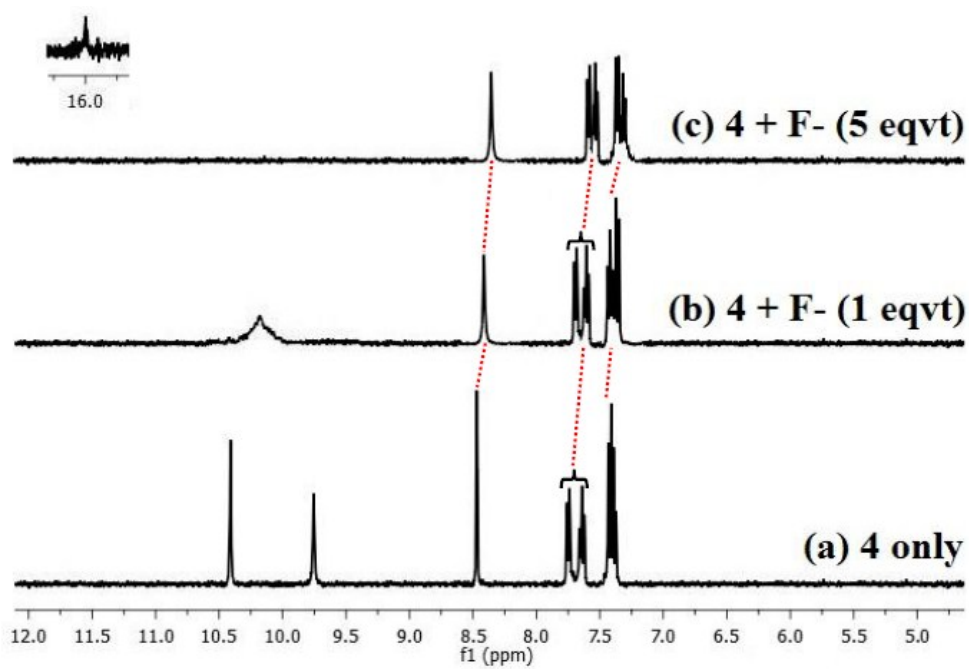

**Figure S16:** Partial <sup>1</sup>H NMR spectra (400 MHz and 298 K) of receptor **4** (10 mM) upon addition of various equivalents of TBAF (40 mM) in DMSO-*d*<sub>6</sub>.

### Cartesian coordinates of receptor 4

|      |    |   |        |        |        |      |    |   |        |        |        |
|------|----|---|--------|--------|--------|------|----|---|--------|--------|--------|
| ATOM | 1  | C | -1.530 | -5.950 | -5.883 | ATOM | 26 | C | 1.621  | 2.185  | 1.782  |
| ATOM | 2  | C | -1.243 | -4.984 | -4.936 | ATOM | 27 | C | 1.767  | 1.449  | 3.093  |
| ATOM | 3  | C | -1.900 | -4.998 | -3.690 | ATOM | 28 | H | 0.823  | 1.443  | 3.648  |
| ATOM | 4  | C | -2.840 | -6.004 | -3.442 | ATOM | 29 | H | 2.063  | 0.413  | 2.918  |
| ATOM | 5  | C | -3.136 | -6.982 | -4.386 | ATOM | 30 | H | 2.526  | 1.894  | 3.731  |
| ATOM | 6  | C | -2.477 | -6.946 | -5.606 | ATOM | 31 | C | 1.936  | 3.629  | 1.750  |
| ATOM | 7  | H | -0.941 | -3.257 | -2.834 | ATOM | 32 | C | 2.033  | 4.373  | 0.479  |
| ATOM | 8  | H | -1.033 | -5.932 | -6.844 | ATOM | 33 | C | 2.468  | 6.410  | 1.746  |
| ATOM | 9  | H | -0.510 | -4.211 | -5.134 | ATOM | 34 | N | -0.570 | -1.376 | 0.125  |
| ATOM | 10 | C | -1.667 | -4.043 | -2.660 | ATOM | 35 | H | -1.007 | -1.291 | 1.034  |
| ATOM | 11 | H | -3.860 | -7.752 | -4.156 | ATOM | 36 | N | 0.746  | 0.323  | 0.843  |
| ATOM | 12 | H | -2.704 | -7.695 | -6.354 | ATOM | 37 | H | 0.478  | -0.012 | 1.765  |
| ATOM | 13 | C | -3.280 | -5.155 | -1.209 | ATOM | 38 | O | 2.245  | 5.747  | 0.575  |
| ATOM | 14 | C | -2.308 | -4.084 | -1.453 | ATOM | 39 | O | 1.951  | 3.933  | -0.643 |
| ATOM | 15 | O | -3.497 | -6.040 | -2.246 | ATOM | 40 | C | 2.472  | 5.703  | 2.953  |
| ATOM | 16 | O | -3.923 | -5.366 | -0.197 | ATOM | 41 | C | 2.748  | 6.401  | 4.142  |
| ATOM | 17 | C | -1.993 | -3.066 | -0.417 | ATOM | 42 | C | 3.011  | 7.756  | 4.106  |
| ATOM | 18 | C | -2.787 | -2.897 | 0.849  | ATOM | 43 | H | 2.757  | 5.859  | 5.080  |
| ATOM | 19 | H | -2.856 | -1.845 | 1.132  | ATOM | 44 | H | 3.239  | 8.289  | 5.020  |
| ATOM | 20 | H | -3.790 | -3.290 | 0.748  | ATOM | 45 | C | 2.177  | 4.307  | 2.910  |
| ATOM | 21 | H | -2.302 | -3.437 | 1.670  | ATOM | 46 | H | 2.121  | 3.790  | 3.859  |
| ATOM | 22 | N | -0.989 | -2.332 | -0.734 | ATOM | 47 | C | 2.711  | 7.778  | 1.699  |
| ATOM | 23 | C | 0.335  | -0.421 | -0.236 | ATOM | 48 | H | 2.686  | 8.297  | 0.750  |
| ATOM | 24 | S | 0.889  | -0.171 | -1.802 | ATOM | 49 | C | 2.985  | 8.443  | 2.884  |
| ATOM | 25 | N | 1.171  | 1.611  | 0.711  | ATOM | 50 | H | 3.184  | 9.507  | 2.861  |

### Cartesian coordinates of receptor 4+F<sup>-</sup>

|      |    |   |        |        |        |      |    |   |        |        |        |
|------|----|---|--------|--------|--------|------|----|---|--------|--------|--------|
| ATOM | 1  | C | -2.165 | -6.339 | -5.876 | ATOM | 26 | C | 1.731  | 2.141  | 1.769  |
| ATOM | 2  | C | -1.630 | -5.380 | -5.090 | ATOM | 27 | C | 1.369  | 1.353  | 3.042  |
| ATOM | 3  | C | -2.044 | -5.264 | -3.758 | ATOM | 28 | H | 0.305  | 1.309  | 3.144  |
| ATOM | 4  | C | -2.932 | -6.162 | -3.237 | ATOM | 29 | H | 1.762  | 0.360  | 2.971  |
| ATOM | 5  | C | -3.492 | -7.101 | -4.045 | ATOM | 30 | H | 1.789  | 1.843  | 3.896  |
| ATOM | 6  | C | -3.128 | -7.204 | -5.348 | ATOM | 31 | C | 1.933  | 3.666  | 1.839  |
| ATOM | 7  | H | -0.742 | -3.462 | -3.279 | ATOM | 32 | C | 2.301  | 4.464  | 0.581  |
| ATOM | 8  | H | -1.856 | -6.434 | -6.896 | ATOM | 33 | C | 2.411  | 6.499  | 1.898  |
| ATOM | 9  | H | -0.897 | -4.708 | -5.485 | ATOM | 34 | N | -0.340 | -0.772 | -0.508 |
| ATOM | 10 | C | -1.503 | -4.112 | -2.902 | ATOM | 35 | H | -0.322 | -0.963 | 0.466  |
| ATOM | 11 | H | -4.224 | -7.772 | -3.647 | ATOM | 36 | N | 1.683  | 0.135  | 0.578  |
| ATOM | 12 | H | -3.576 | -7.949 | -5.971 | ATOM | 37 | H | 0.984  | -0.166 | 1.211  |
| ATOM | 13 | C | -3.048 | -4.931 | -1.148 | ATOM | 38 | F | -0.003 | -0.839 | 1.722  |
| ATOM | 14 | C | -2.019 | -3.925 | -1.677 | ATOM | 39 | O | 2.283  | 5.900  | 0.591  |
| ATOM | 15 | O | -3.291 | -6.166 | -1.839 | ATOM | 40 | O | 2.610  | 3.852  | -0.474 |
| ATOM | 16 | O | -3.679 | -4.676 | -0.089 | ATOM | 41 | C | 2.127  | 5.818  | 3.044  |
| ATOM | 17 | C | -1.594 | -2.715 | -0.824 | ATOM | 42 | C | 2.144  | 6.482  | 4.278  |
| ATOM | 18 | C | -2.200 | -2.510 | 0.577  | ATOM | 43 | C | 2.512  | 7.783  | 4.344  |
| ATOM | 19 | H | -2.237 | -1.464 | 0.800  | ATOM | 44 | H | 1.871  | 5.958  | 5.171  |
| ATOM | 20 | H | -3.190 | -2.915 | 0.600  | ATOM | 45 | H | 2.527  | 8.288  | 5.287  |
| ATOM | 21 | H | -1.594 | -3.009 | 1.304  | ATOM | 46 | C | 1.801  | 4.320  | 3.003  |
| ATOM | 22 | N | -0.728 | -1.871 | -1.284 | ATOM | 47 | H | 1.491  | 3.804  | 3.888  |
| ATOM | 23 | C | 1.079  | -0.361 | -0.697 | ATOM | 48 | C | 2.826  | 7.837  | 1.979  |
| ATOM | 24 | S | 1.857  | -0.481 | -2.052 | ATOM | 49 | H | 3.099  | 8.364  | 1.090  |
| ATOM | 25 | N | 1.866  | 1.521  | 0.642  | ATOM | 50 | C | 2.877  | 8.466  | 3.178  |
|      |    |   |        |        |        | ATOM | 51 | H | 3.193  | 9.487  | 3.233  |

#### 4. Procedure for Job's plot experiment:

A series of solutions containing receptor **4** or **5** and tetrabutylammonium fluoride were prepared such that the sum of the total concentration of receptor **4** or **5** and fluoride ion remained constant (100  $\mu\text{M}$ ). The mole fraction of receptor ( $X_R$ ) was varied from 0.1 to 1.0. The corrected absorbance ( $[A-A_0] / [A_0]$ ) at 546 nm and 542 nm for receptor **4** and **5** respectively were plotted against the molar fraction of the receptor solution. The value of mole fraction of receptor at maximum absorption ( $X_{\text{max}}$ ) was obtained from the plot and the stoichiometry ratio ( $n$ ) of the receptor-fluoride ion complex ( $\text{R:F}_n$ ) at equilibrium was calculated from the relationship,  $n = X_{\text{max}} / (1 - X_{\text{max}})$ .

#### 5. General method for $^1\text{H}$ NMR titrations experiments.

A 10 mM solution of receptor **4** was prepared in  $\text{DMSO-}d_6$ . To a 0.5 ml of receptor solution, various equivalents of tetrabutylammonium fluoride (40 mM in  $\text{DMSO-}d_6$ ) were added to an NMR tube and the spectra were recorded.
